# Supplementary material for: A vaping risks education program for school students: Evaluation of the solve mystery toolkit
Source: PubMed Central journal article supplement — Prev Med Rep. 2022 Jun 9;28:101852. doi: 10.1016/j.pmedr.2022.101852 (PMC9243163; doi:10.1016/j.pmedr.2022.101852), 2022-06-09
Supplement: mmc1.pdf [file mmc1.pdf]

# A Vaping Risks Education Program for School Students: The SOLVE Mystery Toolkit

## SUPPLEMENTARY MATERIAL

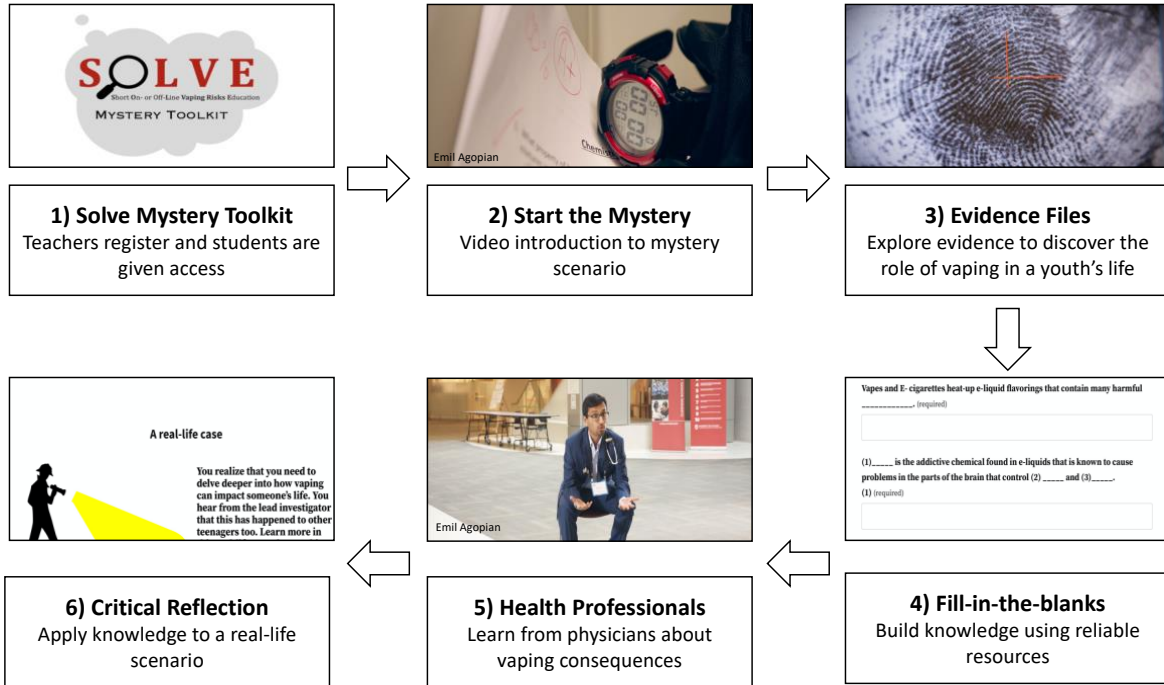

Supplementary Figure A: SOLVE Mystery Toolkit Structure. Novel design including a mystery video scenario, evidence files, knowledge acquisition questions, a video of health professionals, and critical reflection questions.
